# Supplementary material for: Imaging NAD(H) Redox Alterations in Cryopreserved Alveolar Macrophages from Ozone-Exposed Mice and the Impact of Nutrient Starvation during Long Lag Times
Source: MDPI journal article supplement (doi:10.3390/antiox10050767), 2021-05-12
Supplement: s1 [file s1]

## Supplementary Materials

**Table S1. Mice used for this study and the redox indices and ROS of their alveolar macrophages**

| Mouse ID | Fp (a.u.) | NADH (a.u.) | Fp/(NADH+Fp) | ROS (a.u.) | Exposure       | Age (week) | Sex | SP-A status |
|----------|-----------|-------------|--------------|------------|----------------|------------|-----|-------------|
| 12341    | 1234      | 650         | 0.608        | 296        | FA             | 8          | M   | KO          |
| 12388    | 868       | 599         | 0.549        | 228        | FA             | 8          | M   | KO          |
| 12389    | 820       | 549         | 0.558        | 256        | FA             | 8          | M   | KO          |
| 12390    | 835       | 579         | 0.560        | 294        | FA             | 8          | M   | KO          |
| 14647    | 829       | 556         | 0.564        | 265        | FA             | 8          | M   | KO          |
| 14648    | 870       | 629         | 0.549        | 247        | FA             | 8          | M   | KO          |
| 14649    | 1242      | 824         | 0.574        | 282        | FA             | 8          | M   | KO          |
| 12339    | 1053      | 614         | 0.583        | 384        | O <sub>3</sub> | 8          | M   | KO          |
| 12340    | 1501      | 651         | 0.659        | 436        | O <sub>3</sub> | 8          | M   | KO          |
| 14591    | 1191      | 633         | 0.610        | 240        | O <sub>3</sub> | 8          | M   | KO          |
| 14592    | 1251      | 688         | 0.607        | 302        | O <sub>3</sub> | 8          | M   | KO          |
| 14645    | 1264      | 662         | 0.631        | 311        | O <sub>3</sub> | 8          | M   | KO          |
